# Supplementary material for: Genomic View of Bipolar Disorder Revealed by Whole Genome Sequencing in a Genetic Isolate
Source: PLoS Genet. 2014 Mar 13;10(3):e1004229. doi: 10.1371/journal.pgen.1004229 (PMC3953017; doi:10.1371/journal.pgen.1004229)
Supplement: Table S4 — Result from rareFBAT burden test analysis of 62 candidate regions for BP and schizophrenia identified by recent GWAS studies. The table shows chromosomal region, number of Omin2.5 SNP included, rareFBAT P-value and (if applicable) the previously reported associated SNP. (XLS) [file pgen.1004229.s015.xls]

## Sheet: Sheet1
Chromosome	Begin	End	Phenotype	# SNPs	rareFBAT P-value	Reported associated SNP
1	41789822	41889822	BP	56	0.1783	PGC SNP: rs4660531
1	73275828	74099273	SCZ	190	0.551325
1	78419660	78519660	BP	20	0.64448	PGC SNP: rs11162405
1	79204762	79304762	BP	51	0.34478	PGC SNP: rs12730292
1	98141112	98664991	SCZ	190	0.0773054
1	101928334	102028334	BP	70	0.493771	PGC SNP: rs263906
1	115823047	115923047	BP	80	0.699147	PGC SNP: rs10776799
1	175239399	175339399	BP	61	0.327434	PGC SNP: rs875326
1	243418063	243627135	SCZ	68	0.945536
1	243593066	244025999	SCZ	119	0.647517
2	37422072	37592628	SCZ	78	0.85051
2	65708525	65808525	BP	83	0.0146455	PGC SNP: rs3845817
2	97360949	97460949	BP	24	0.966924	PGC SNP: rs6746896
2	99332892	99432892	BP	30	0.78594	PGC SNP: rs7578035
2	145139727	145214607	SCZ	30	0.217105
2	169116282	169216282	BP	65	0.523734	PGC SNP: rs4668059
2	194822183	194922183	BP	8	0.396377	PGC SNP: rs2176528
2	200628118	201293421	SCZ	205	0.560201
2	233550961	233808241	SCZ	108	0.90758
3	36814489	36914489	BP	52	0.00236156	PGC SNP: rs6550435
3	52215002	53175017	SCZ	242	0.840923
3	52785354	52885354	BP	41	0.900461	PGC SNP: rs736408
3	53782903	53882903	BP	56	0.596079	PGC SNP: rs3774609
4	86917830	87017830	BP	45	0.46194	PGC SNP: rs10028075
4	162229385	162329385	BP	110	0.454399	PGC SNP: rs17395886
5	60484179	60843706	SCZ	98	0.9398
5	101581848	101870822	SCZ	87	0.0190343
5	151888959	152835304	SCZ	291	0.834038
5	152505453	152707306	SCZ	60	0.0901311
6	31596138	32813768	SCZ	2539	0.668546
6	152740573	152840573	BP	30	0.175557	PGC SNP: rs9371601
7	1827717	2346115	SCZ	187	0.935331
7	1900809	2000809	BP	34	0.729679	PGC SNP: rs4332037
7	2291055	2391055	BP	32	0.386795	PGC SNP: rs13245097
8	89188454	89761163	SCZ	128	0.238106
8	142250315	142350315	BP	66	0.251133	PGC SNP: rs7827290
8	143297312	143410423	SCZ	52	0.922684
9	4891997	4991997	BP	68	0.318932	PGC SNP: rs3968
10	18601928	18934390	SCZ	192	0.0766454
10	61789831	61889831	BP	99	0.35125	PGC SNP: rs9804190
10	62229124	62329124	BP	41	0.555365	PGC SNP: rs10994397
10	80885083	80985083	BP	80	0.48462	PGC SNP: rs780148
10	104487871	105245420	SCZ	204	0.729833
10	105327349	105427349	BP	60	0.107242	PGC SNP: rs2281587
11	66501002	66601002	BP	11	0.0822959	PGC SNP: rs10896135
11	79027193	79127193	BP	92	0.128255	PGC SNP: rs12576775
11	79073883	79173883	BP	80	0.12388	PGC SNP: rs2175420
11	130706918	130894976	SCZ	103	0.0187875
12	2285731	2440464	SCZ	69	0.843436
12	2369896	2469896	BP	40	0.705667	PGC SNP: rs4765913
12	49168171	49268171	BP	35	0.883502	PGC SNP: rs2070615
12	49169138	49269138	BP	37	0.916358	PGC SNP: rs11168751
12	49429968	49529968	BP	19	0.840306	PGC SNP: rs7296288
12	123447928	123913433	SCZ	91	0.683519
14	51475473	51575473	BP	96	0.00319037	PGC SNP: rs8006348
15	38429899	38529899	BP	61	0.521843	PGC SNP: rs16966413
15	38936368	39036368	BP	90	0.774246	PGC SNP: rs12912251
18	52722378	52827668	SCZ	63	0.283389
19	13124312	13224312	BP	10	0.683148	PGC SNP: rs11085829
19	19354937	19744079	SCZ	83	0.520092
19	49178272	49278272	BP	70	0.962658	PGC SNP: rs2287921
20	41169419	41269419	BP	74	0.355178	PGC SNP: rs6102917
