# Supplementary material for: Genomic View of Bipolar Disorder Revealed by Whole Genome Sequencing in a Genetic Isolate
Source: PLoS Genet. 2014 Mar 13;10(3):e1004229. doi: 10.1371/journal.pgen.1004229 (PMC3953017; doi:10.1371/journal.pgen.1004229)
Supplement: Table S11 — Result from rareFBAT burden test analysis of 83 genes under the 4p16.3 linkage peak. Exonic missense and eSNP variants were included in the test for each gene. (XLS) [file pgen.1004229.s022.xls]

## Sheet: Sheet1
Peak chromosome	Gene	#SNPs	rFBAT P	corr. rFBAT P
4p16.3	LOC402160	31 SNPs	0.0667992	0.154257
4p16.3	SH3BP2	31 SNPs	0.0774534	0.160716
4p16.3	ZFYVE28	58 SNPs	0.0789834	0.134072
4p16.3	EVC2	28 SNPs	0.0970916	0.125821
4p16.3	FLJ35424	11 SNPs	0.0997075	0.24784
4p16.3	PDE6B	1 SNPs	0.10247	0.317311
4p16.3	LOC100133461	7 SNPs	0.106903	0.22518
4p16.3	TMEM175	123 SNPs	0.11842	0.169605
4p16.3	JAKMIP1	17 SNPs	0.128269	0.121859
4p16.3	FGFR3	7 SNPs	0.137005	0.180067
4p16.3	ADD1	117 SNPs	0.138315	0.379486
4p16.3	KIAA0232	12 SNPs	0.140894	0.2288
4p16.3	FAM193A	64 SNPs	0.152366	0.248963
4p16.3	TMEM129	23 SNPs	0.154599	0.217236
4p16.3	GAK	14 SNPs	0.159195	0.163044
4p16.3	SLBP	1 SNPs	0.16763	0.118004
4p16.3	OTOP1	15 SNPs	0.184564	0.38979
4p16.3	WHSC1	55 SNPs	0.194598	0.269943
4p16.3	FAM53A	26 SNPs	0.198796	0.189038
4p16.3	C4orf6	1 SNPs	0.205546	0.317311
4p16.3	C4orf42	3 SNPs	0.211181	0.174549
4p16.3	MFSD10	56 SNPs	0.227707	0.309794
4p16.3	CRIPAK	315 SNPs	0.23047	0.226173
4p16.3	C4orf44	164 SNPs	0.232765	0.381509
4p16.3	HAUS3	4 SNPs	0.237391	0.260923
4p16.3	RNF4	111 SNPs	0.241307	0.390582
4p16.3	HGFAC	90 SNPs	0.262506	0.450211
4p16.3	TACC3	29 SNPs	0.265416	0.268428
4p16.3	DOK7	68 SNPs	0.282995	0.434321
4p16.3	LRPAP1	46 SNPs	0.331174	0.477073
4p16.3	LOC100129917	6 SNPs	0.335327	0.445793
4p16.3	NOP14	177 SNPs	0.335838	0.557142
4p16.3	TADA2B	4 SNPs	0.343592	0.541005
4p16.3	RGS12	104 SNPs	0.364888	0.604709
4p16.3	MSX1	12 SNPs	0.372725	0.42776
4p16.3	EVC	29 SNPs	0.388393	0.372371
4p16.3	HTT	25 SNPs	0.437036	0.441922
4p16.3	POLN	63 SNPs	0.440872	0.365475
4p16.3	SLC26A1	81 SNPs	0.442485	0.353687
4p16.3	CRMP1	16 SNPs	0.453453	0.489697
4p16.3	ZNF718	40 SNPs	0.482996	0.577637
4p16.3	CPLX1	50 SNPs	0.494507	0.392502
4p16.3	PIGG	7 SNPs	0.496985	0.69536
4p16.3	LOC100507266	95 SNPs	0.502374	0.705957
4p16.3	WFS1	82 SNPs	0.503884	0.444904
4p16.3	MFSD7	42 SNPs	0.510302	0.442377
4p16.3	CNO	1 SNPs	0.514164	0.509704
4p16.3	PSAPL1	1 SNPs	0.531615	0.577469
4p16.3	NAT8L	1 SNPs	0.541547	0.590258
4p16.3	LYAR	29 SNPs	0.546879	0.637072
4p16.3	TMEM128	3 SNPs	0.550408	0.567035
4p16.3	PCGF3	117 SNPs	0.572408	0.548297
4p16.3	ABCA11P	8 SNPs	0.581107	0.767863
4p16.3	D4S234E	5 SNPs	0.582994	0.580051
4p16.3	STK32B	35 SNPs	0.594142	0.64575
4p16.3	GRK4	87 SNPs	0.633595	0.752928
4p16.3	DGKQ	47 SNPs	0.644369	0.68533
4p16.3	KIAA1530	1 SNPs	0.653109	0.519036
4p16.3	WHSC2	26 SNPs	0.661045	0.591998
4p16.3	PPP2R2C	18 SNPs	0.662086	0.711447
4p16.3	LETM1	1 SNPs	0.663355	0.694887
4p16.3	ADRA2C	89 SNPs	0.665166	0.518867
4p16.3	CYTL1	9 SNPs	0.674987	0.863655
4p16.3	SPON2	215 SNPs	0.675363	0.494249
4p16.3	MXD4	38 SNPs	0.696799	0.637913
4p16.3	TBC1D14	2 SNPs	0.726186	0.833827
4p16.3	RNF212	4 SNPs	0.758761	0.606844
4p16.3	S100P	12 SNPs	0.788892	0.757957
4p16.3	LOC285484	18 SNPs	0.799122	0.716305
4p16.3	MRFAP1L1	2 SNPs	0.809334	0.818105
4p16.3	SORCS2	1 SNPs	0.818546	0.852684
4p16.3	LOC285463	1 SNPs	0.847545	0.71296
4p16.3	TMED11P	16 SNPs	0.886265	0.856088
4p16.3	ZBTB49	133 SNPs	0.886513	0.68535
4p16.3	CCDC96	2 SNPs	0.931414	0.904177
4p16.3	LOC100130872	127 SNPs	0.936074	0.896277
4p16.3	TNIP2	27 SNPs	0.936386	0.867183
4p16.3	MAN2B2	4 SNPs	0.949506	0.967667
4p16.3	STX18	10 SNPs	0.953105	0.865181
4p16.3	ATP5I	11 SNPs	0.963634	0.825757
4p16.3	MRFAP1	7 SNPs	0.974985	0.890804
4p16.3	GRPEL1	2 SNPs	0.979456	0.959276
4p16.3	FGFRL1	157 SNPs	0.988289	0.991506
