# Supplementary material for: Genomic View of Bipolar Disorder Revealed by Whole Genome Sequencing in a Genetic Isolate
Source: PLoS Genet. 2014 Mar 13;10(3):e1004229. doi: 10.1371/journal.pgen.1004229 (PMC3953017; doi:10.1371/journal.pgen.1004229)
Supplement: Table S12 — Result from rareFBAT burden test analysis of 249 genes under the 7q21 linkage peak. Exonic missense and eSNP variants were included in the test for each gene. (XLS) [file pgen.1004229.s023.xls]

## Sheet: Sheet1
Peak chromosome	Gene	#SNPs	rFBAT P	corr. rFBAT P
7q21	TECPR1	255 SNPs	2.07779e-05	0.000295294
7q21	PPP1R9A	27 SNPs	0.00282701	0.0202399
7q21	DLX6	7 SNPs	0.00309898	0.0118322
7q21	RINT1	88 SNPs	0.0048305	0.04511
7q21	KPNA7	2 SNPs	0.00583154	0.0144786
7q21	SERPINE1	9 SNPs	0.00645564	0.0433258
7q21	STEAP1	320 SNPs	0.00678785	0.0712776
7q21	EFCAB10	48 SNPs	0.00771265	0.0523032
7q21	DLX5	30 SNPs	0.00820663	0.0131724
7q21	TAS2R16	5 SNPs	0.0142258	0.00821406
7q21	MLL5	80 SNPs	0.0146919	0.076014
7q21	PON3	64 SNPs	0.0159875	0.102891
7q21	ZNHIT1	36 SNPs	0.0189451	0.0757862
7q21	SEMA3D	13 SNPs	0.0192929	0.0160468
7q21	LOC100216546	78 SNPs	0.0199228	0.169743
7q21	EPHB4	4 SNPs	0.020765	0.0517924
7q21	LRRC17	16 SNPs	0.0219522	0.125439
7q21	SRPK2	5 SNPs	0.0220363	0.0254251
7q21	BAIAP2L1	116 SNPs	0.0229522	0.054075
7q21	EMID2	120 SNPs	0.027593	0.121111
7q21	ZAN	27 SNPs	0.0336732	0.0891284
7q21	C7orf61	15 SNPs	0.0342125	0.0958347
7q21	PILRA	146 SNPs	0.0365989	0.116161
7q21	MYH16	2 SNPs	0.0380706	0.0523978
7q21	GIGYF1	57 SNPs	0.0401676	0.0897312
7q21	PTPRZ1	24 SNPs	0.0498295	0.163676
7q21	LRCH4	2 SNPs	0.0504176	0.101901
7q21	POLR2J	29 SNPs	0.0542099	0.112155
7q21	SPDYE3	47 SNPs	0.0544734	0.28869
7q21	PCOLCE	2 SNPs	0.0545356	0.172249
7q21	TFPI2	4 SNPs	0.0588809	0.182083
7q21	CLDN15	47 SNPs	0.0618813	0.150786
7q21	MET	196 SNPs	0.0648	0.210535
7q21	ZNF655	2 SNPs	0.0706453	0.155516
7q21	STEAP2	714 SNPs	0.0707206	0.115005
7q21	PNPLA8	27 SNPs	0.0740475	0.0734112
7q21	UFSP1	113 SNPs	0.0781249	0.147937
7q21	MEPCE	80 SNPs	0.0789563	0.20157
7q21	TSC22D4	8 SNPs	0.079047	0.168129
7q21	LOC100128334	1 SNPs	0.0832645	0.179712
7q21	PPP1R35	14 SNPs	0.0869795	0.32232
7q21	ZCWPW1	133 SNPs	0.100938	0.183774
7q21	HEPACAM2	1 SNPs	0.10247	0.157299
7q21	PON2	8 SNPs	0.110676	0.415539
7q21	SLC12A9	67 SNPs	0.118465	0.230206
7q21	SEMA3A	169 SNPs	0.118986	0.056429
7q21	FOXP2	83 SNPs	0.125594	0.171106
7q21	TMEM130	2 SNPs	0.134743	0.22612
7q21	MUC17	42 SNPs	0.141541	0.185452
7q21	CYP3A5	58 SNPs	0.15515	0.532555
7q21	GATS	1 SNPs	0.157299	0.317311
7q21	ASNS	94 SNPs	0.163632	0.158601
7q21	TRRAP	74 SNPs	0.174567	0.199039
7q21	ZNF3	5 SNPs	0.176404	0.377916
7q21	PTCD1	2 SNPs	0.176846	0.572182
7q21	CFTR	343 SNPs	0.177255	0.197386
7q21	LHFPL3	16 SNPs	0.178877	0.243898
7q21	ADAM22	134 SNPs	0.179439	0.617375
7q21	ACHE	46 SNPs	0.180728	0.502872
7q21	DPY19L2P2	2 SNPs	0.181432	0.4499
7q21	TRIM4	320 SNPs	0.194172	0.167306
7q21	ING3	1 SNPs	0.196706	0.251349
7q21	SH2B2	162 SNPs	0.19686	0.189545
7q21	WNT2	187 SNPs	0.197254	0.253945
7q21	MYL10	4 SNPs	0.200956	0.31133
7q21	FEZF1	11 SNPs	0.205822	0.395334
7q21	SMURF1	64 SNPs	0.208476	0.18741
7q21	LAMB1	77 SNPs	0.211279	0.261938
7q21	TAC1	168 SNPs	0.21246	0.154007
7q21	ALKBH4	1 SNPs	0.212941	0.233695
7q21	PILRB	314 SNPs	0.217637	0.243024
7q21	SYPL1	33 SNPs	0.21844	0.320141
7q21	PON1	2 SNPs	0.23449	0.255969
7q21	FAM185A	9 SNPs	0.237795	0.364932
7q21	GNGT1	1 SNPs	0.239317	0.396144
7q21	C7orf53	188 SNPs	0.246606	0.302866
7q21	ASZ1	1 SNPs	0.248213	0.345779
7q21	PEX1	10 SNPs	0.267596	0.372378
7q21	STAG3	40 SNPs	0.273515	0.182042
7q21	LOC100129845	6 SNPs	0.274216	0.368875
7q21	PVRIG	114 SNPs	0.278776	0.350801
7q21	ZNF804B	46 SNPs	0.282727	0.540712
7q21	HBP1	6 SNPs	0.289199	0.306845
7q21	POP7	8 SNPs	0.293243	0.35645
7q21	C7orf59	64 SNPs	0.30414	0.377815
7q21	ST7-AS1	11 SNPs	0.307165	0.41808
7q21	SAP25	19 SNPs	0.312772	0.285765
7q21	KRIT1	1 SNPs	0.316356	0.414216
7q21	SHFM1	3 SNPs	0.316722	0.375167
7q21	FAM133B	1 SNPs	0.317311	0.317311
7q21	LOC154860	101 SNPs	0.319338	0.375599
7q21	IQUB	217 SNPs	0.323524	0.385343
7q21	CASD1	39 SNPs	0.325088	0.432255
7q21	HYAL4	7 SNPs	0.325659	0.379392
7q21	PEG10	2 SNPs	0.326598	0.427682
7q21	CDK14	77 SNPs	0.338964	0.368318
7q21	RNF148	22 SNPs	0.340318	0.499308
7q21	NDUFA5	118 SNPs	0.340376	0.399995
7q21	GATAD1	61 SNPs	0.343415	0.445099
7q21	DLD	189 SNPs	0.346853	0.341085
7q21	GTPBP10	85 SNPs	0.354367	0.380803
7q21	CBLL1	84 SNPs	0.360256	0.40816
7q21	MOSPD3	1 SNPs	0.368468	0.401614
7q21	AZGP1	32 SNPs	0.377199	0.486804
7q21	CTTNBP2	39 SNPs	0.380102	0.439553
7q21	PUS7	8 SNPs	0.380265	0.539609
7q21	SAMD9	67 SNPs	0.394844	0.491119
7q21	ASB4	56 SNPs	0.39533	0.454487
7q21	ABCB1	47 SNPs	0.39856	0.53794
7q21	C7orf52	22 SNPs	0.399284	0.567358
7q21	PDK4	9 SNPs	0.399731	0.487319
7q21	C7orf43	7 SNPs	0.403473	0.538329
7q21	CYP3A43	1 SNPs	0.405381	0.491297
7q21	ATP5J2-PTCD1	51 SNPs	0.406488	0.4658
7q21	MDFIC	1 SNPs	0.41108	0.475051
7q21	ATXN7L1	1 SNPs	0.414216	0.157299
7q21	LOC100506064	1 SNPs	0.415798	0.480617
7q21	LOC154872	1 SNPs	0.417304	0.369171
7q21	CAV2	199 SNPs	0.41859	0.434575
7q21	C7orf64	4 SNPs	0.422705	0.326773
7q21	PLOD3	11 SNPs	0.425177	0.401917
7q21	GRM3	31 SNPs	0.429519	0.536382
7q21	MBLAC1	10 SNPs	0.431329	0.222539
7q21	AP1S1	12 SNPs	0.431849	0.676996
7q21	ATP5J2	5 SNPs	0.443961	0.829131
7q21	CLDN12	14 SNPs	0.446204	0.416141
7q21	ABCB4	90 SNPs	0.448599	0.606295
7q21	ZKSCAN1	3 SNPs	0.44964	0.477622
7q21	CDHR3	120 SNPs	0.458241	0.577513
7q21	FZD1	24 SNPs	0.458738	0.476505
7q21	SRI	76 SNPs	0.46012	0.516585
7q21	C7orf74	6 SNPs	0.467307	0.655206
7q21	RPL19P12	3 SNPs	0.468302	0.494088
7q21	AASS	14 SNPs	0.469936	0.179628
7q21	PCLO	87 SNPs	0.476884	0.130879
7q21	CADPS2	1 SNPs	0.4795	0.157299
7q21	ZSCAN21	5 SNPs	0.483097	0.753594
7q21	RABL5	99 SNPs	0.484547	0.754812
7q21	LAMB4	32 SNPs	0.48547	0.527844
7q21	TP53TG1	79 SNPs	0.48607	0.553874
7q21	PPP1R3A	1 SNPs	0.491297	0.466854
7q21	GPR85	72 SNPs	0.493446	0.501675
7q21	TES	77 SNPs	0.51339	0.636377
7q21	ARPC1B	2 SNPs	0.521415	0.518663
7q21	CYP3A7	1 SNPs	0.531615	0.563703
7q21	ASB15	3 SNPs	0.537639	0.326498
7q21	WASL	128 SNPs	0.541779	0.589817
7q21	SGCE	15 SNPs	0.549387	0.615906
7q21	ACTL6B	56 SNPs	0.549805	0.522618
7q21	LOC100506489	1 SNPs	0.552133	0.461329
7q21	FIS1	12 SNPs	0.554939	0.749105
7q21	SLC25A13	2 SNPs	0.557367	0.544255
7q21	C7orf62	218 SNPs	0.558568	0.698974
7q21	DNAJB9	7 SNPs	0.563205	0.635355
7q21	COL1A2	11 SNPs	0.570403	0.529684
7q21	ORAI2	29 SNPs	0.574096	0.886533
7q21	MCM7	6 SNPs	0.576995	0.759719
7q21	PIK3CG	21 SNPs	0.578564	0.631763
7q21	PRKRIP1	29 SNPs	0.580576	0.580838
7q21	MUC12	22 SNPs	0.587132	0.680245
7q21	VGF	2 SNPs	0.592076	0.585512
7q21	SPAM1	4 SNPs	0.604498	0.533116
7q21	ZNF498	2 SNPs	0.605717	0.627965
7q21	ST7	32 SNPs	0.607143	0.598476
7q21	SAMD9L	84 SNPs	0.613018	0.617619
7q21	EPO	96 SNPs	0.618853	0.817002
7q21	LRRN3	15 SNPs	0.631572	0.629711
7q21	IMMP2L	60 SNPs	0.63216	0.706898
7q21	KIAA1324L	2 SNPs	0.637509	0.704497
7q21	GNB2	16 SNPs	0.644264	0.654296
7q21	LRWD1	37 SNPs	0.653299	0.515807
7q21	DGAT2L7	1 SNPs	0.654721	0.563703
7q21	NAPEPLD	7 SNPs	0.65829	0.702825
7q21	CNPY4	41 SNPs	0.661171	0.701181
7q21	IFRD1	238 SNPs	0.663055	0.637295
7q21	FLJ42280	55 SNPs	0.665236	0.789087
7q21	COPS6	16 SNPs	0.675602	0.83511
7q21	SEMA3E	85 SNPs	0.67784	0.719183
7q21	TMEM168	22 SNPs	0.681168	0.666463
7q21	RELN	75 SNPs	0.683149	0.778075
7q21	FBXL13	1 SNPs	0.694887	0.723674
7q21	RUNDC3B	7 SNPs	0.695912	0.940626
7q21	OR2AE1	1 SNPs	0.6988	0.73714
7q21	TSPAN12	1 SNPs	0.700702	0.744415
7q21	SLC26A4	45 SNPs	0.701079	0.708336
7q21	C7orf60	20 SNPs	0.7043	0.900454
7q21	TMEM229A	89 SNPs	0.709914	0.804685
7q21	COG5	322 SNPs	0.716452	0.661504
7q21	C7orf63	219 SNPs	0.730123	0.743201
7q21	NAA38	381 SNPs	0.737951	0.75525
7q21	SPDYE2L	1 SNPs	0.738883	0.705457
7q21	BCAP29	221 SNPs	0.739567	0.838488
7q21	CALCR	41 SNPs	0.751933	0.79597
7q21	DMTF1	42 SNPs	0.752643	0.74644
7q21	DOCK4	5 SNPs	0.754398	0.620805
7q21	SLC13A1	26 SNPs	0.757705	0.813437
7q21	DBF4	3 SNPs	0.761906	0.93007
7q21	NPTX2	2 SNPs	0.77669	0.806301
7q21	WNT16	72 SNPs	0.779554	0.697433
7q21	LMTK2	6 SNPs	0.789244	0.851168
7q21	SLC26A5	1 SNPs	0.792147	0.799495
7q21	MUC3A	8 SNPs	0.79417	0.843048
7q21	LOC645591	2 SNPs	0.808138	0.786496
7q21	C7orf58	190 SNPs	0.808582	0.986963
7q21	DUS4L	88 SNPs	0.813516	0.928259
7q21	CACNA2D1	1 SNPs	0.818472	1
7q21	TFEC	3 SNPs	0.827707	0.831726
7q21	CROT	47 SNPs	0.828581	0.741797
7q21	BET1	18 SNPs	0.829876	0.888082
7q21	ACN9	1 SNPs	0.834827	0.796253
7q21	LOC286002	22 SNPs	0.838155	0.826024
7q21	TFR2	8 SNPs	0.841184	0.85246
7q21	ZNF789	1 SNPs	0.84739	0.869417
7q21	AP4M1	132 SNPs	0.849918	0.704792
7q21	PMPCB	13 SNPs	0.852121	0.969804
7q21	GNG11	9 SNPs	0.852364	0.872685
7q21	PRKAR2B	279 SNPs	0.852702	0.802918
7q21	ANKIB1	1 SNPs	0.853362	0.855607
7q21	ZKSCAN5	20 SNPs	0.856284	0.933826
7q21	MTERF	18 SNPs	0.85738	0.871122
7q21	CDK6	147 SNPs	0.871138	0.809643
7q21	AKAP9	62 SNPs	0.876316	0.916519
7q21	FBXO24	2 SNPs	0.900268	0.782893
7q21	GPC2	93 SNPs	0.901461	0.706423
7q21	CUX1	6 SNPs	0.902678	0.690812
7q21	C7orf51	348 SNPs	0.903412	0.826762
7q21	ZNF277	18 SNPs	0.910991	0.977325
7q21	LOC100506341	3 SNPs	0.924577	0.942311
7q21	NF-E4	3 SNPs	0.92901	0.903681
7q21	GPR22	122 SNPs	0.929992	0.976521
7q21	TRIP6	46 SNPs	0.932101	0.977723
7q21	NRCAM	48 SNPs	0.934823	0.926911
7q21	CYP3A4	2 SNPs	0.935358	0.851226
7q21	CYP51A1	184 SNPs	0.9376	0.949889
7q21	AGFG2	92 SNPs	0.938292	0.84289
7q21	SRRT	18 SNPs	0.943563	0.89411
7q21	SLC26A3	13 SNPs	0.946558	0.993402
7q21	GAL3ST4	4 SNPs	0.951269	0.0990694
7q21	ORC5	79 SNPs	0.951275	0.944433
7q21	LOC100216545	11 SNPs	0.954676	0.979294
7q21	LMOD2	4 SNPs	0.962182	0.961296
7q21	DYNC1I1	63 SNPs	0.966492	0.930051
7q21	CAV1	131 SNPs	0.974106	0.974075
7q21	CPSF4	95 SNPs	0.982853	0.993254
7q21	TRIM56	14 SNPs	0.984037	0.974311
7q21	STEAP4	5 SNPs	0.989478	0.979502
7q21	LRRD1	272 SNPs	0.99161	0.992659
7q21	BHLHA15	1 SNPs	1	1
7q21	GJC3	1 SNPs	1	1
